1  
2  
3  
4  
5  
6  
7  
8  
9  
10  
11  
12  
13  
14  
15  
16  
17  
18  
19  
20  
21

## **Chronic release of tailless phage particles from *Lactococcus lactis* #**

Yue Liu<sup>1#</sup>, Svetlana Alexeeva<sup>1, 4#</sup>, Herwig Bachmann<sup>2, 4</sup>, Jesús Adrián Guerra Martínez<sup>1</sup>, Nataliya Yeremenko<sup>3</sup>, Tjakko Abee<sup>1</sup> and Eddy J. Smid<sup>1, 4\*</sup>

1 Food Microbiology, Wageningen University & Research, Wageningen, The Netherlands

2 NIZO B.V., Ede, the Netherlands

3 Amsterdam UMC, University of Amsterdam, Department of Rheumatology & Clinical Immunology and Department of Experimental Immunology, Amsterdam, the Netherlands.

4 TI Food and Nutrition, Wageningen, the Netherlands

\* Correspondence: Eddy J. Smid [eddy.smid@wur.nl](mailto:eddy.smid@wur.nl)

# These authors contributed equally to this work. Both authors are female, contributed equally to the research as well as writing of the manuscript. The first listed author finalized the manuscript.

22

23

## 24 **Abstract**

25 *Lactococcus lactis* strains residing in the microbial community of a complex dairy starter culture named  
26 “Ur” are hosts to prophages belonging to the family *Siphoviridae*. *L. lactis* strains (TIFN1 to TIFN7)  
27 showed detectable spontaneous phage production and release ( $10^9$ - $10^{10}$  phage particles/mL) and up  
28 to 10-fold increases upon prophage induction, while in both cases we observed no obvious cell lysis,  
29 typically described for the lytic life cycle of *Siphoviridae* phages. Intrigued by this phenomenon, we  
30 investigated the host-phage interaction using strain TIFN1 (harboring prophage proPhi1) as a  
31 representative. We confirmed that during the massive phage release, all bacterial cells remain viable.  
32 Further, by monitoring phage replication *in vivo*, using a green fluorescence protein reporter combined  
33 with flow cytometry, we demonstrated that the majority of the bacterial population (over 80%) is  
34 actively producing phage particles when induced with mitomycin C. The released tailless phage  
35 particles were found to be engulfed in lipid membranes, as evidenced by electron microscopy and lipid  
36 staining combined with chemical lipid analysis. Based on the collective observations, we propose a  
37 model of phage-host interaction in *L. lactis* TIFN1, where the phage particles are engulfed in  
38 membranes upon release, thereby leaving the producing host intact. Moreover, we discuss possible  
39 mechanisms of chronic, or non-lytic release of LAB *Siphoviridae* phages and its impact on the bacterial  
40 host.

41

## 42 **Introduction**

43 Bacteriophages are highly diverse in shape, structure and composition. They can be icosahedral,  
44 spherical, pleomorphic, filamentous, droplet-, bottle- and spindle-shaped; some are with a long or  
45 short tail, some are tailless, engulfed in a lipid bilayer or containing lipids beneath the protein capsid;  
46 the genetic material can be double-stranded or single-stranded, DNA or RNA (1, 2). The broad  
47 accessibility of high-throughput sequencing technologies also revealed a high degree of genetic  
48 diversity in bacteriophages; mosaic genomes and numerous novel sequences of unknown function  
49 have been reported (3–6). Over 90% of reported phages are tailed double-stranded DNA phages  
50 belonging to the order *Caudovirales* (7). Tailed phages primarily interact with their host cell by using  
51 tail fibers and baseplate structures, and use the tail for penetrating the bacterial cell surface and viral  
52 DNA injection (8, 9). At the end of infection cycle, virulent tailed phage particles are released from the  
53 cells by holin-lysin induced lysis of the host. So called temperate bacteriophages undergo an  
54 alternative, lysogenic cycle in which the bacteriophage DNA integrates into the chromosome of the

55 host becoming a prophage (10, 11). In this dormant state the prophage can replicate its genome as a  
56 part of the bacterial chromosome. Under conditions insulting its host's DNA integrity the prophage can  
57 enter the lytic cycle meaning that it excises from the bacterial chromosome, replicates its genome,  
58 assembles into mature phage particles and escapes the host following phage holin-lysin induced cell  
59 burst (12, 13).

60 About 4% of the described bacteriophages lack genes encoding tail proteins and they represent  
61 polyhedral, filamentous or pleomorphic phages. Tailless phages use other attachment devices, such as  
62 protein complexes or spikes at exposed surface sites (14–16). Some members of this group also apply  
63 alternative strategies to release their progeny from infected bacteria. Filamentous phages of the  
64 *Inoviridae* family are assembled at the cell surface and excreted from infected cells continuously by  
65 extrusion, a process mediated by membrane translocation and channel proteins and that leaves the  
66 host cells fully viable (17, 18). Another distinct mechanism of progeny release is budding, a delicate  
67 mechanism typical for animal viruses. During budding these viruses are encapsulated by the cell  
68 membrane and released, without killing the host. So far, budding has been suggested only for the  
69 family of *Plasmaviridae*, tailless phages infecting wall-less bacteria *Acholeplasma* species via  
70 membrane fusion (19, 20). In contrast to lytic phage release that kills the host, the non-lytic release is  
71 also referred to as chronic release (21). The group of tailless phages includes bacteriophages that have,  
72 in addition to nucleic acid and proteins, internal or external lipid constituents - a property originally  
73 associated with viruses infecting multicellular eukaryotes. Currently, the lipid-containing  
74 bacteriophages are classified into four families, *Corticoviridae*, *Cystoviridae*, *Plasmaviridae* and  
75 *Tectiviridae* (22).

76 Notably, all currently known phages infecting lactic acid bacteria (LAB) are members of the  
77 *Caudovirales* order (7), or tailed phages. Bacterium-phage interactions play a key role in the evolution  
78 of both partners in the interaction. Earlier, we described (pro)phages abundantly released and co-  
79 existing within a naturally evolved microbial community – mixed (originally undefined) complex starter  
80 culture of LAB used in dairy fermentations (23). These cultures represent an interesting model  
81 ecosystem because it was established through long term propagation by back-slopping. Practicing  
82 back-slopping creates the boundaries for natural selection which drives adaptive evolution of the  
83 culture and its constituent microbial strains.

84 Based on analysis of the genomic content the isolated (pro)phages belong to P335 group lactococcal  
85 phages of *Siphoviridae* family, order *Caudovirales*. However, they possess some peculiar features:  
86 phage particles are abundantly released spontaneously and further stimulated by mitomycin C  
87 induction (23). They appear to be tailless due to disruptions in tail-protein encoding genes (6).  
88 Moreover, the release of the (pro)phages from the host cells was not accompanied by detectable cell

89 lysis, a phenomenon which is typical for release of *Siphoviridae* bacteriophages (24–27). We set out to  
90 investigate this phenomenon in this study. Here we demonstrate that the tailless *Siphoviridae* phage  
91 particles are enclosed in lipid membrane and are released from the cells by a non-lytic mechanism, a  
92 phenomenon not described before in LAB phages.

93

## 94 **Materials and methods**

### 95 **Strains and media**

96 All *Lactococcus lactis* strains used in this study were statically cultivated in M17 broth (OXOID) with  
97 0.5% (wt/vol) lactose addition (OXOID) at 30°C, unless specified otherwise. All *Escherichia coli* strains  
98 harboring plasmids used in this study were cultivated at 37°C, in LB broth (BD Difco) supplemented  
99 with 150µl/ml erythromycin and shaken at 120 rpm.

### 100 **Cell growth, prophage induction, phage purification and quantification**

101 Overnight cultures in M17 broth supplemented with 0.5% lactose (LM17) were diluted up to OD<sub>600 nm</sub>  
102 = 0.2 and allowed to grow for 1 hour at 30°C before mitomycin C (MitC) was added (final  
103 concentrations of 1 µg/ml). For control purposes, the same diluted cultures without MitC were used.  
104 Incubation proceeded for 6 or 7 hours and the turbidity at 600 nm was monitored at 1 hour intervals.  
105 At the end of induction the total cell number was determined by direct counting in a haemocytometer  
106 chamber and the viable count was made by a standard spread plating on M17 agar supplemented with  
107 0.5% lactose. Released phage particles were concentrated from the culture supernatants by PEG/NaCl  
108 precipitation as previously described (6), and the quantity was estimated based on phage DNA content  
109 in culture supernatants or in PEG/NaCl concentrated phage suspensions using agarose gel  
110 electrophoresis as previously described (23).

### 111 **Construction of plasmids for chromosomal integration into prophage sites**

112 Plasmid pSA114 is a derivative of plasmid pCS1966 (28) - the chromosomal integration vector, allowing  
113 positive selection of cells in which the plasmid had been excised from the genome, resulting in  
114 unmarked integrations in the chromosome of *L. lactis*.

115 Two DNA fragments 671 and 941bp of adjacent loci of prophage (proPhi1) were amplified from *L. lactis*  
116 TIFN1 chromosome using 1M\_HR1\_Fw+/1M\_HR1\_Rv and 1M\_HR2\_Fw/1M\_HR2\_1Rv+ primer pairs  
117 respectively (see table 1). The two fragments were interconnected by multiple cloning site (MCS)  
118 introduced by PCR overlap extension mutagenesis in order to allow further insertions between the  
119 homology arms. The resulting 1.7 Kb-PCR fragment was digested with KpnI and NcoI and ligated into  
120 corresponding sites of pSEUDO-GFP (29) resulting in plasmid pSA114. The 34 bp MCS between the

121 amplified prophage sequences of pSA114 was used for further cloning. pSA116, the vector for  
122 integration of CmR (chloramphenicol resistance cassette, *cat*) into prophage was made by inserting  
123 CmR between the prophage homology regions of pSA114. Chloramphenicol cassette (*cat*) was  
124 amplified by PCR using pGhCAM2\_Fw/pGhCAM\_Rv primers (Table 1) and pVE6007 [pGhost7, (30)] as  
125 a template. The fragment was digested with EcoRI and BamHI and sub cloned into corresponding sites  
126 of pSA114, yielding pSA116. Plasmid pSA120, the vector for integration of *gfp* [the gene of the  
127 superfolder variant of GFP, (31)] into prophage was made as follows. The *gfp* flanked by CP25 artificial  
128 promoter (32) and two terminator sequences was excised from pIL-JK2 using EcoRI and BamHI and  
129 inserted into the same site (between the prophage homology regions) of pSA114, yielding pSA120.

130 **Table 1. Primers used in this study. Restriction enzyme (RE) sites are underlined.**

| Name        | RE                   | Nucleotide sequence (5'–3')                                        |
|-------------|----------------------|--------------------------------------------------------------------|
| 1M_HR1_Fw+  | MCS                  | <u>GAATTC</u> CCGGGTCGACAAGCTTAGATCTGGATCCTTGTGGTTTTGGGCCATCACTTTA |
| 1M_HR1_Rv   | NcoI                 | TTCCATGGGCGCTCCTTCAGGAAAGACGATTA                                   |
| 1M_HR2_Fw   | KpnI                 | TTGGTACCGGCGCTTGTTATTCTGCTTCTGA                                    |
| 1M_HR2_1Rv+ | MCS                  | GGATCCAGATCTAAGCTTGTGCGACCCGGGAATTCTTTGGGTGGCCATTTCTACA            |
| pGhCAM2_fw  | EcoRI                | AAGAATTCAAGGGGATTTTATGCGTGAGAATG                                   |
| pGhCAM_rv   | BglII/XhoI<br>/BamHI | ATGGATCCTCGAGATCTGAAAACCCTGGCGTTACCC                               |

131

### 132 **Modification of the chromosomal integration strategy for industrial strains and construction of new** 133 **integration vectors**

134 The designed vectors are derivatives of pCS1966 and unable to replicate in *L. lactis*. The original  
135 strategy (28) includes both transformation and chromosomal integration by homologous  
136 recombination for the successful acquisition of such vectors by *L. lactis* cells. Therefore, the plasmid  
137 acquisition is drastically dependent on the efficiency of transformation. Industrial “wild” strains are  
138 usually featured by poor transformability compared to “domesticated” laboratory *L. lactis* strains.  
139 Therefore, a new strategy has been designed by splitting plasmid transformation and its homologous  
140 recombination events. We constructed vectors that combine *L. lactis* thermosensitive (Ts) replication  
141 origin *repA<sup>Ts</sup>* and *oroP* gene. Ts replication origin allows the plasmid replication under permissive  
142 temperature after the transformation event, followed by integration through homologous  
143 recombination at elevated temperature. Gene *oroP* enables counterselection for loss of the plasmid  
144 backbone, leaving unmarked integrations in the chromosome of *L. lactis* at specific target sites.

145 New vectors, pSA130-YL and pSA132-YL were constructed as follows. *E. coli* strain EC1000 (33) was  
146 used for cloning and plasmid propagation. pG<sup>+</sup>host9 (30) was used to provide the backbone with *repA*<sup>T5</sup>  
147 and *ermAM*. The plasmids pSA116 and pSA120 were used to provide the cassettes of DNA labels (CmR  
148 or *sf-gfp*) flanked by proPhi1 homology regions (MHR) and *oroP*. The KpnI/FspI fragment of pSA116,  
149 was ligated into KpnI/EcoRV digested pG<sup>+</sup>host9, resulting in pSA130-YL. pSA132-YL was constructed in  
150 two steps: first KpnI/SalI fragment of pSA120 was ligated into the corresponding site of pG<sup>+</sup>host9, then  
151 SalI/FspI fragment of pSA120 was ligated into SalI/EcoRV site, yielding pSA132-YL.

## 152 **Plasmid integration and backbone elimination**

153 *L. lactis* transformation was performed using a modified protocol as we described earlier (23). The  
154 confirmed transformants were propagated at the permissive temperature, 28°C in M17 broth (0.5%  
155 glucose or lactose) with 3 µg/ml erythromycin, and stored in 15% glycerol at -80°C until further use.  
156 For the integration step, *L. lactis* cells transformed with constructed plasmids were incubated at 37°C  
157 overnight, the OD<sub>600</sub> of cultures was measured, cells were plated in proper dilutions (depending on  
158 OD<sub>600</sub> values) on selection plates (L/GM17, 1.5% agar, 0.5 M sucrose and 3 µg/ml erythromycin), and  
159 incubated at 37°C till colonies emerged. The presence and orientation of the whole plasmid inserts  
160 were checked with PCR, and correct validated clones were maintained as 15% glycerol stocks at -80°C.

161 For the backbone elimination step, the validated clones with integrated plasmids were inoculated in 2  
162 ml SA medium (34) containing 1% lactose or glucose and incubated at 30°C overnight. Then they were  
163 diluted 10x in SA (1% lactose or glucose) medium and incubated 30°C for 6 h. Thereafter 10 µl of the  
164 culture was streaked on SA (1% lactose or glucose) agar plate supplemented with 10 µg/ml 5-  
165 fluoroorotate (Sigma). Plates were incubated at 30°C until 5-fluoroorotate resistant colonies emerged.  
166 For resulting labelled strains, TIFN1::*cat* and TIFN1::*gfp* (inserted genes from corresponding plasmid-  
167 donors, pSA130-YL and pSA132-YL), correct inserts and their location on TIFN1 chromosome were  
168 confirmed by PCR, sequencing the PCR products and phenotypic analysis: either green fluorescence or  
169 chloramphenicol resistance.

## 170 **Phage lipid and DNA labelling**

171 The dyes used for labelling of lipids and DNA are shown in Table 2. To stain DNA, PEG precipitated  
172 phage particles were incubated with Sybr Green (Invitrogen, Molecular probes Cat. no. S7563) at 80°C  
173 for 10 minutes in 10<sup>-4</sup> final dilution of commercial stock as described earlier (35) or with GelRed nucleic  
174 acid gel stain (Biotium, 10<sup>-4</sup> final dilution of commercial stock) under the same conditions.

175 **Table 2. Corresponding labelling of lipid and DNA dyes.**

| Label used in text | Name of the dye |
|--------------------|-----------------|
|--------------------|-----------------|

|                         |                               |
|-------------------------|-------------------------------|
| <b>Lipophilic dye 1</b> | FM 4-64                       |
| <b>Lipophilic dye 2</b> | MitoTracker Green FM          |
| <b>Lipophilic dye 3</b> | CellMask Deep Red             |
| <b>DNA dye 1</b>        | Sybr Green                    |
| <b>DNA dye 2</b>        | GelRed Nucleic Acid Gel stain |

176

177 For membrane detection CellMask DeepRed (Life Technologies GmbH) was used in final dilution  $10^{-3}$   
178 of commercial stock and phages were incubated for 5 minutes at 37°C; FM4-64 (Molecular Probes)  
179 was used in a final concentration 20 µg/ml, incubation proceeded 15 minutes at room temperature;  
180 and MitoTracker Green FM (Molecular Probes Cat. no. M7514) was used at final concentration of 20  
181 nM and phages were incubated with the dye for 15 minutes at 37°C. For double staining of DNA and  
182 membrane, MitoTracker was added to the phages stained with GelRed, the samples were vortexed  
183 and measured immediately by flow cytometry. In control experiment the membranes were first  
184 extracted by adding to the phage suspension equal volumes of chloroform, the samples were vortexed,  
185 centrifuged during 3 minutes at 14000× g, aqueous phase containing the phage particles was collected  
186 and the staining was performed as described above.

187 When phages were not added, no detectable fluorescent particles were present in the control samples.  
188 To exclude contamination of phage suspension by bacterial cells, bacteria were added to phage  
189 suspension prior to staining of either DNA or lipids. In these control samples an additional population  
190 of particles with much higher fluorescence intensity was detected (not shown), as anticipated, given a  
191 bacterial cell contains much higher amounts of lipids and DNA per particle compared to phages.

## 192 **Flow Cytometry**

193 Prior to flow cytometry analysis 2 µl of fluorescent microspheres ( $1 \times 10^{-3}$  of the stock Fluoresbrite® YG  
194 Microspheres 0.75µm, Polysciences) was added and the volume was adjusted to 500 µl by adding  
195 FACSFlow solution (10 mM phosphate-buffered saline, 150 mM NaCl, pH 7.4; Becton-Dickinson).

196 Samples were analyzed by using a BD FACS Aria™ III flow cytometer (BD Biosciences, San Jose, CA).  
197 The cytometer was set up using an 85 µm nozzle and was calibrated daily using BD FACSDiva Cytometer  
198 Setup and Tracking (CS&T) software and CS&T Beads (BD Biosciences). An 488 nm, air-cooled argon-  
199 ion laser and the photomultipliers with 488/10 band pass filter for forward and side scatter and with  
200 filter 530/30 nm (with 502 LP filter) was used for the detection of GFP, Sybr Green and MitoTracker.  
201 GelRed was excited with a yellow-green 561nm laser and detected using a 610/20 nm with LP 600 nm  
202 filter. CellMask DeepRed was excited with 633 nm laser and detected with 660/20 nm filter. FM4-64

203 dye was excited with 561 nm laser and detected with a 780/60 nm with LP 735 nm filter. FSC and SSC  
204 voltages of 300 and 350, respectively, and a threshold of 1,200 on FSC was applied to gate on the  
205 bacteriophages and bacterial cells population.

206 Data were acquired by using BD FACSDiva™ software and analyzed by using FlowJo flow cytometry  
207 analysis software (Tree Star, Ashland, OR).

### 208 **Chemical lipid analysis**

209 Normal phase high performance liquid chromatography (NP-HPLC) with evaporative light scattering  
210 detection (ELSD) was used for the quantitative analysis of phospholipids (36).

211 The analyses were performed with a 600E System Controller (Waters), vacuum degasser (Knauer), 231  
212 XL sampling injector (Gilson) and a 3300 (ELSD) evaporative light scattering detector (Alltech).  
213 Extraction of the phospholipids from 2 g freeze dried milk sample was done with a mixture of  
214 chloroform, methanol and ammonia (NH<sub>3</sub>) in water. After centrifugation of the sample 10 min at 4500  
215 g, 10.0 mL of the supernatant was evaporated under vacuum at 40°C in a heating block. When the  
216 sample was dried, 1 mL absolute ethanol was added and again evaporated to dryness. The dried  
217 sample was dissolved in 1.0 mL of the phospholipid solvent containing iso-octane, chloroform and  
218 methanol.

219 Fifty milliliter of the sample solution was injected on an Xbridge amide analytical column, 3.5 μm, 4.6  
220 x 250 mm (Waters). The components were eluted at a flow rate of 1.0 mL/min with a gradient of eluent  
221 A (iso-octane and acetone) and eluent B (2-propanol and ethyl acetate) to eluent C (2-propanol, water,  
222 ammonia and acetic acid) in 50 minutes. Data analysis was done with Chromeleon software version  
223 7.2 (Thermo Fisher Scientific). The non-linear response of the ELSD was converted to a more linear  
224 signal in order to increase the accuracy of the quantification of phospholipids differing in fatty acid  
225 composition compared to those of the standard.

226 1,2-dipalmitoyl-sn-glycero-3-phosphoryl ethanolamine (PE, Matreya), 1,2-dipalmitoyl-sn-glycero-3-  
227 phosphoryl glycerol (PG, Matreya), 3-sn-lyso phosphatidyl ethanolamine (LPE, Sigma), DL-α-  
228 phosphatidyl choline (dipalmitoyl, C16:0) (PC, Sigma), Sphingomyelin (SM, Sigma), phosphatidyl serine  
229 (oleoyl) (PS, Matreya), lyso-phosphatidylcholine (palmitoyl) (LPC, Matreya) and phosphatidyl inositol  
230 (linoleoyl) (PI, Matreya) were used as calibration standards for quantitative analysis. A reference  
231 sample (buttermilk powder) with known amounts of phospholipids was analyzed and recovery of  
232 spiked phospholipids was performed to control for accuracy and precision of the method.

### 233 **Scanning/transmission electron microscopy**



234 For scanning electron microscopy, *L. lactis* TIFN1 and T11c cultures were subjected to 1 µg/ml MitC  
235 induction as described above. After 5h of induction the samples were fixed with 2.5% glutaraldehyde  
236 in PBS buffer for 1 hour at room temperature. A droplet of the fixed cell suspension was placed onto  
237 poly-L-lysine coated coverslips (Corning BioCoat, USA) and allowed to stand for 1 hour at room  
238 temperature. After rinsing in PBS the samples were post stained in 1% osmium tetroxide in  
239 PBS. Subsequently the samples were dehydrated in a graded series of ethanol followed by critical point  
240 drying with CO<sub>2</sub> (Leica EM CPD300, Leica Microsystems). The coverslips were fitted onto sample stubs  
241 using carbon adhesive tabs and sputter coated with 6 nm Iridium (Leica SCD500). Samples were imaged  
242 at 2 KV, 6 pA, at room temperature in a field emission scanning electron microscope (Magellan 400,  
243 FEI Company, Oregon, USA).

244 For transmission electron microscopy, purified phage particles were subjected to negative staining and  
245 examined exactly as described previously (23).

246

## 247 **Results**

### 248 **No detectable cell lysis during phage release**

249 A previous study on *Lactococcus lactis* strains TIFN1-7 originating from the mixed cheese starter culture  
250 indicated no obvious drop in the optical density of the bacterial cultures following prophage activation  
251 (23). We were triggered by this observation and therefore we further examined this phenomenon  
252 using strain TIFN1 as a model. We first analyzed the cell viability in prophage induced cultures  
253 supplemented with mitomycin C (MitC) and control cultures without MitC induction. The total cell  
254 counts determined using a haemocytometer and the number of culturable cells, i.e., colony forming  
255 units, were similar (supplementary Fig. S1), indicating that at least the vast majority of TIFN1 cells  
256 present in the tested conditions remained viable. Both cell counting methods showed no obvious  
257 differences in cell numbers from the prophage-induced cultures and non-induced control cultures,  
258 further confirming that in the *L. lactis* strains, represented by lysogen TIFN1, there was no detectable  
259 cell lysis in spite of the abundant phage release upon phage induction.

260

### 261 **The major part of the culture actively produces phages**

262 To elucidate whether phage production is a population-wide activity in a clonal culture of strain TIFN1,  
263 we monitored *in vivo* phage replication using a reporter strain, in which a *gfp* reporter was inserted  
264 within the prophage. In cells actively replicating the phage particles, green fluorescence intensity was  
265 expected to increase. As mentioned, we used *L. lactis* TIFN1 as the model strain, which harbors the

266 genome of prophage proPhi1 (6). The insertion site was selected within the prophage sequence  
267 between stop codons of open reading frames (ORFs) 48 and 49 encoded on opposite DNA strands (Fig.  
268 1A), resulting in strain TIFN1::*gfp*. In parallel, a fluorescence-negative control strain was constructed  
269 in which the chloramphenicol resistance gene *cat* was inserted at the same site, yielding strain  
270 TIFN1::*cat*.

271 The derived strain TIFN1::*gfp* showed similar growth behavior (Fig. 1B) to the wild-type TIFN1 (data  
272 see Alexeeva et al., 2018) with and without prophage induction by MitC, as indicated by monitoring  
273 culture turbidity. TIFN1::*gfp* also produced phage particles (Fig. 1C) to a similar amount as the wild-  
274 type (data see Alexeeva et al., 2018):  $10^{10}$  phage particles/mL were found in cultures without added  
275 MitC and phage numbers increased to  $\sim 10^{11}$ /ml upon MitC induction in 6 h, as estimated by quantifying  
276 phage DNA content.

277 To study the *in vivo* dynamics of prophage induction in *L. lactis* TIFN1 we used strain TIFN1::*gfp* and  
278 followed in time the fluorescence intensity of the cells by flow cytometry in MitC-induced and un-  
279 induced cultures. As a fluorescence-negative control we used TIFN1::*cat*. TIFN1::*cat* exhibited very low  
280 background fluorescence, not changing in time and not affected by MitC addition (Fig. 1D). The un-  
281 induced culture of TIFN1::*gfp* showed moderate fluorescence already at the initiation of induction  
282 (time point 0 h), and the fluorescence increased slightly in time. This is in line with the observed  
283 constitutive phage induction and replication taking place even without MitC induction (Fig. 1C and Fig.  
284 1D). The induced culture of TIFN1::*gfp* showed a clear increase in fluorescence intensity till the 4<sup>th</sup>  
285 hour post-induction, and then the fluorescence intensity declined slightly. The increase in fluorescence  
286 intensity of the cells was 2.5-3 fold and correlated with the increase in the number of released phage  
287 particles (Fig. 1C and Fig. 1D).

288 To examine whether the major fraction of the bacterial population actively produces phage particles,  
289 the distribution of fluorescence in individual cells was measured by flow cytometry. The fluorescence  
290 distribution per particle in the negative control (TIFN1::*cat*, black unfilled) as well as in un-induced  
291 cultures of TIFN1::*gfp* (grey unfilled) and MitC induced TIFN1::*gfp* (green filled) at time point 3 hours  
292 post-induction was measured (Fig. 1E). In the MitC induced TIFN1::*gfp* culture more than 80% of the  
293 cells are green fluorescent and more than 60% are highly fluorescent, which is a distinct population  
294 (second green peak in Fig. 1E). This indicates that the majority of the cells in the population actively  
295 replicate phage DNA and produce phage proteins. When relating this observation to the cell count  
296 results (supplementary Fig. S1), where no obvious reduction in cell number was detected under phage  
297 inducing conditions, the hypothesis of non-lytic phage release is supported.

298

## 299 **Phages are enclosed in lipid bilayers**

300 Non-lytic, chronic phage release has been previously described to occur via budding (*Plasmaviridae*)  
301 or extrusion (*Inoviridae*) (17–20). In case the budding mechanism of cell exit is recruited by the phage  
302 particles, it is expected to be enveloped by cellular lipids upon release. Therefore, first of all, we  
303 analyzed the presence of a lipid bilayer in/engulfing the phage particles. We employed three lipophilic  
304 dyes staining cellular membranes/lipid bilayers, but all essentially non-fluorescent in aqueous media.  
305 All three lipophilic dyes were efficiently staining the phage particles (Fig. 2A-C), confirming presence  
306 of lipid membranes. Moreover, when the phage particles were treated with chloroform prior to  
307 staining with lipophilic dye 3, the fluorescence was largely abolished (Fig. 2C, blue line). The chloroform  
308 treated particles were visualized by EM and showed typical morphology of phage heads (see Fig. 1A &  
309 B from Alexeeva et al., 2018). We further confirmed that the lipid enclosed particles are indeed  
310 bacteriophages containing DNA: the phage particles were readily stained with the two DNA dyes (Fig.  
311 2D & E). Moreover, double staining with DNA dye 2 (red fluorescence) in combination with lipophilic  
312 dye 2 (membrane stain, green fluorescence) resulted in double stained particles, confirming that the  
313 phage particles indeed contain DNA and are enclosed by membranes (Fig. 2F). This conclusion is also  
314 supported by the previous study where the tailless phage particles were isolated with the same  
315 method and subjected to DNA sequencing, and full phage genomes were recovered with more than  
316 100-fold higher coverage than background (6).

317 Since the hypothesis of phage particles being enclosed in lipid bilayer is now supported by  
318 experimental evidence, we continued to find additional support by studying the phage particles with  
319 transmission electron microscopy (TEM). In this case, phage particles were not pre-treated with  
320 chloroform to retain the lipid membrane, and we compared the particle morphology and size to  
321 chloroform-treated phage particles. It was observed that the morphology of untreated (Fig. 3A) and  
322 chloroform-treated (Fig. 3B) particles was similar, although they did show different electron-densities  
323 as reflected by the different darkness of particles, possibly indicating differences in compositions as  
324 chloroform will disintegrate lipid bilayers and dissolve lipids. We also noticed a difference in particle  
325 sizes caused by chloroform treatment. When measuring the particle diameters (defined as the distance  
326 between two opposite corners of the hexagon shape, measured by ObjectJ), untreated particles  
327 showed diameters of  $65.4 \pm 4.1$  nm ( $n=54$ ), significantly ( $p<0.00001$ , 2-tailed, unequal variance) larger  
328 than chloroform-treated particles with diameters  $58.0 \pm 2.0$  nm ( $n=27$ ). The difference in average  
329 diameters,  $7.4 \pm 4.6$  nm, coincides with the thickness of two lipid bilayers (37). This analysis also  
330 supports the hypothesis that the released phage particles of *L. lactis* TIFN1 are enclosed in lipid  
331 bilayers.

332

### 333 **Lipid composition of phage particles differs from host cells**

334 Next, we extracted the lipids from phage crops produced by strain TIFN1 and also from whole cell-  
335 derived protoplasts and subjected them to chemical lipid analysis using liquid chromatography coupled  
336 with mass spectrometry (LS-MS). As a phage-free control, phage-cured strain TI1c (23) was subjected  
337 to the same procedure of prophage induction and purification from the culture supernatant. The TIFN1  
338 phage specimen lipid signals were well above the background level of the phage-free control from TI1c  
339 (supplementary Fig. S2). Phosphatidyl glycerol (PG) and cardiolipin (CA) were detected in phage  
340 samples as well as in cellular lipid samples, however, the ratio between the two major lipid species  
341 differed between the phage and the cell membrane lipid samples (Fig. 4).

342 The major lipid in the *L. lactis* cell membrane is cardiolipin and a CA/PG ratio of about 2.2 has been  
343 determined for *L. lactis* membrane earlier (38). We found the CA/PG ratio value of 1.5 for cellular lipids  
344 extracted from TIFN1 (Fig. 4B). Remarkably, lipids of the phage crops were enriched in phosphatidyl  
345 glycerol with a CA/PG ratio of 0.4 (Fig. 4A). This suggests that the released phage particles are possibly  
346 enclosed by phospholipids derived from distinct regions of lipid rafts/domains in the *L. lactis* cell  
347 membrane (39, 40).

348 To further characterize the phage release from the cells we employed scanning electron microscopy  
349 to observe MitC induced cells of wild-type strain TIFN1 and its prophage cured derivative strain TI1c  
350 (Fig. 5). The MitC treated TI1c had the usual morphology and smooth surface of a Gram-positive coccus  
351 without any detectable alteration (Fig. 5C & D). Strain TIFN1 however, showed a ruffled cell surface  
352 and accumulated numerous budlike, small spherical structures, typically near the cell division septum  
353 (Fig. 5A & B). The phage cured strain TI1c lacked these extracellular structures.

354 The observation that extracellular particles are accumulated near the cell division planes is in line with  
355 our speculation made from the observation of a difference in lipid composition between phage  
356 particles and the host cells indicating that the processes of phage engulfing and release are specific for  
357 defined regions of the cell membrane.

358

### 359 **Discussion**

360 Bacteriophages are thought to be the most abundant biological entities on Earth and adopted a striking  
361 variety of forms and mechanisms of interaction with their host cells (41). Combining observations from  
362 this study, we propose a novel mechanism of interaction for lactococcal phages and their hosts, where  
363 the tailless *Siphoviridae* phage particles are enclosed in a lipid membrane and are released from the

364 cells by a non-lytic mechanism (Fig. 6). This chronic, non-lytic phage release mechanism has not been  
365 previously described for LAB phages or *Siphoviridae* phages.

366 The prophage found in *L. lactis* TIFN1, referred to as proPhi1, is classified in the family of *Siphoviridae*,  
367 which members are by definition tailed bacteriophages. Genomic analysis also revealed that genes  
368 encoding tail structures are present in these prophages, but due to disruptions in some of the tail  
369 genes, the assembled phage particles show a tailless phenotype (6). Interestingly, the lipid-containing  
370 phages discovered so far, mostly assigned to families of *Corticoviridae*, *Cystoviridae*, *Plasmaviridae* and  
371 *Tectiviridae*, are exclusively tailless phages (42). Plausibly, the reason that the membrane-containing  
372 feature was not found in any tailed phages is that they already achieve successful infection with the  
373 help of the tail device that efficiently penetrates the cell envelop, and no alternative infection  
374 mechanism was required (42). Tailless phages, on the other hand, are evolved to utilize the membrane  
375 to infect or interact with their hosts. For example, enveloped phages use a membrane fusion  
376 mechanism to interact with the host and deliver their genetic materials (42–45). Therefore, it was part  
377 of the hypothesis that the tailless proPhi1 being enclosed in a lipid membrane could serve as an  
378 alternative infection strategy as the tail device is not available anymore, but so far we did not obtain  
379 evidence demonstrating the (re)infection of host by the membrane-enclosed tailless phage particles  
380 (data not shown). It remains to be investigated whether the hurdle was for membrane-enclosed phage  
381 particles to attach and enter the host, or rather for the tailless phage particles to inject their genetic  
382 material into the bacterial cytoplasm to complete the life cycle.

383 In previously described membrane-enclosed phages, the mechanism of incorporation of lipids to form  
384 virus-specific vesicles has been subjected to investigation. However, not everything is completely  
385 understood until today, but several mechanisms are proposed (42). For one, phage encoded  
386 membrane proteins trigger cytoplasmic membrane formation in the host, and enclose the phages  
387 during assembly in the cell. For example, *Cystoviridae* phage phi6 applies a mechanism, in which the  
388 protein P9 was found to facilitate cytoplasmic membrane formation in bacteria (46). Host-derived  
389 membrane components can be an alternative mechanism. In this case, phage-encoded membrane  
390 proteins are incorporated into the host membrane, providing a scaffold for phage assembly, and the  
391 assembled phage particles are released upon lysis of the host (47, 48). Examples are *Tectiviridae* phage  
392 PRD1 employing membrane protein P10 (49), and *Corticoviridae* phage PM2 employing membrane  
393 proteins P3 and P6 to interact with phage-specific areas on the cell membrane (42, 50). For all above  
394 mentioned phage-encoded proteins, we did not find homology to any of the proteins encoded on  
395 proPhi1 or any of the other prophages found in lactococci isolated from the starter culture Ur (6).  
396 However, it should be noted that other membrane-associated protein coding sequences were indeed  
397 predicted in the Ur prophages, namely ORF42 in proPhi1&5, ORF08 in proPhi2&4 and ORF49 in proPhi6

398 (6). Targeting phage particles to special areas of cell membrane by membrane-associated proteins  
399 could potentially be an explanation for the distinct lipid composition associated with released phage  
400 particles. Nevertheless, non-lytic release via a mechanism of budding is still not confirmed in other  
401 phages but suggested for plasmavirus (19) and is considered a very delicate life cycle of viruses, as it  
402 leaves the host alive while phages get to spread the progeny (42). Whether the non-lytic release of  
403 membrane-enclosed phages in *L. lactis* TIFN1 and other lactococcal strains found in the starter culture  
404 Ur is a result of long-term phage-host co-evolution thus becomes an even more interesting hypothesis,  
405 especially as we observed similar growth behavior during phage release in other Ur strains (23).

406 Another intriguing question is how the membrane-enclosed phage particles escape from the bacterial  
407 host without lysis, especially given the fact that *L. lactis* is Gram-positive, possessing thick cell wall  
408 outside the cell membrane. A similar question has been raised for extracellular membrane vesicles  
409 (MVs or EVs) produced by Gram-positive bacteria ever since the discovery of such phenomenon. It has  
410 already been known for a long time that Archaea, Gram-negative bacteria, and mammalian cells  
411 actively secrete the nano-sized, lipid bilayer-enclosed particles named EVs, harboring various  
412 nucleotide and protein cargos as a mechanism for cell-free intercellular interactions (51–53). Only  
413 recently, evidence was provided that EVs are also released by organisms with thick cell walls like Gram-  
414 positive bacteria, mycobacteria and fungi (54–57), but the mechanistic insights are still lacking. Brown  
415 et al. (2015) proposed several non-mutually exclusive mechanisms on the formation and release of EVs  
416 through thick cell walls, including the actions of turgor pressure, cell wall-modifying enzymes and  
417 protein channels. The most evidence-supported mechanism is via cell-wall modifying enzymes, namely  
418 autolysin (58) and prophage-encoded holin-endolysin (59, 60). Notably, phage particles have also been  
419 identified as part of the cargos in EVs produced by *Bacillus subtilis* (59). Further studies dedicated to  
420 elucidating the roles of autolysin and/or phage-encoded holin-endolysin in *L. lactis* TIFN1 would serve  
421 to reveal the release mechanism in this case.

422 Moreover, the effect of turgor pressure could also play a role in addition (57). It is plausible that upon  
423 prophage induction, the defective proPhi1 particles are abundantly assembled and accumulated in the  
424 cells, causing cytoplasmic crowding that results in elevated turgor pressure. The cell division site is  
425 often the target site of autolysins (61), in combination with induced phage-encoded endolysins,  
426 forming the weakest spot on the cell and giving opportunities for the phage particles to release under  
427 turgor pressure, which could explain our observation that the membrane-enclosed particles are mostly  
428 observed near the cell division sites, and have a distinct lipid profile comparing the whole cell samples.  
429 Therefore, we propose that the phenomenon of non-lytic membrane engulfed phage release observed  
430 in *L. lactis* TIFN1 could be driven by the concerted action of enzymatic activity and turgor pressure on

431 the cell envelope, in combination with phage-encoded proteins to achieve phage-specific engulfment  
432 and release.

433 Although this is the first study to demonstrate non-lytic release of membrane-engulfed phages in LAB,  
434 we would like to point out that this could be a more common but up to now overlooked phenomenon  
435 in other microbial communities for two reasons. Firstly, studies focused on the detection of inducible  
436 prophages, use cell lysis/plaque formation as a benchmark for phage activation. Obviously, when  
437 (tailless) phage particles are released via membrane envelopes or other non-lytic ways, no apparent  
438 phenotype will be observed thus discouraging further investigation. Secondly, it is a common practice  
439 in phage isolation protocol to employ chloroform to remove contaminating materials derived from  
440 bacterial cells (42), however, this treatment demolishes the membrane structures and therefore the  
441 lipid-containing phenotype is conceivably not retrieved in further analysis of phage particles. We hope  
442 that our findings will inspire further studies, not only in elucidating the detailed mechanism of this  
443 case, but also in awareness and discovery of similar phenomena in other microbial species, and further  
444 shedding light on bacteria-phage interaction and co-evolution.

445

#### 446 **Data availability statement**

447 The datasets used and/or analyzed during the current study are available from the corresponding  
448 author on reasonable request.

449

#### 450 **Authors' contributions**

451 SA and EJS conceived the study. SA, EJS and YL designed the experiments. YL and SA executed the  
452 experiments and carried out the data analysis and interpretation. HB was involved in the chemical lipid  
453 analysis, JAGM prepared samples for electron microscopy and obtained the pictures. NY and SA did  
454 the fluorescent lipid detection. YL, SA, TA and EJS wrote the manuscript.

455 All authors read and approved the final manuscript.

456

#### 457 **Funding**

458 This study was financed by Top Institute Food and Nutrition (TIFN) in Wageningen, the Netherlands. In  
459 addition, YL was subsidized by the Netherlands Organisation for Scientific Research (NWO) through  
460 the Graduate Program on Food Structure, Digestion and Health.

461

## 462 **Conflict of interest**

463 Author Herwig Bachmann was employed by the company NIZO B.V. The remaining authors declare  
464 that the research was conducted in the absence of any commercial or financial relationships that could  
465 be construed as a potential conflict of interest.

466

## 467 **Acknowledgments**

468 We thank Lieke Gijtenbeek and Jan Kok (RUG) for providing plasmids pCS1966, pVE6007, and pSEUDO-  
469 GFP. Emmanuelle Maguin (INRA, France) is acknowledged for providing pG<sup>+</sup>host9. The authors  
470 cordially thank Guido Staring (NIZO food research, Ede, the Netherlands) for performing LC-MS/ESI  
471 lipid analysis. The electron microscopy images were obtained with the help of Marcel Giesbers at the  
472 Wageningen Electron Microscopy Centre (WEMC) of Wageningen University (Wageningen, The  
473 Netherlands).

474

475

476

## 477 **References**

- 478 1. Clokie MRJ, Millard AD, Letarov A V., Heaphy S. 2011. Phages in nature. *Bacteriophage* 1:31–45.
- 479 2. Hatfull GF, Hendrix RW. 2011. Bacteriophages and their genomes. *Curr Opin Virol* 1:298–303.
- 480 3. Ackermann H-W. 2009. Phage classification and characterization. *Methods Mol Biol* 501:127–140.
- 481 4. Krupovic M, Prangishvili D, Hendrix RW, Bamford DH. 2011. Genomics of bacterial and archaeal viruses:  
482 dynamics within the prokaryotic virosphere. *Microbiol Mol Biol Rev* 75:610–35.
- 483 5. Parmar KM, Gaikwad SL, Dhakephalkar PK, Kothari R, Singh RP. 2017. Intriguing interaction of  
484 bacteriophage-host association: an understanding in the era of omics. *Front Microbiol* 8:559.
- 485 6. Alexeeva S, Liu Y, Zhu J, Kaczorowska J, Kouwen TRHM, Abee T, Smid EJ. 2021. Genomics of tailless  
486 bacteriophages in a complex lactic acid bacteria starter culture. *Int Dairy J* 114:104900.
- 487 7. Ackermann H-W. 2007. 5500 Phages examined in the electron microscope. *Arch Virol* 152:227–243.
- 488 8. McGrath S, Neve H, Seegers JFML, Eijlander R, Vegge CS, Brøndsted L, Heller KJ, Fitzgerald GF,  
489 Vogensen FK, van Sinderen D. 2006. Anatomy of a Lactococcal phage tail. *J Bacteriol* 188:3972–82.
- 490 9. Legrand P, Collins B, Blangy S, Murphy J, Spinelli S, Gutierrez C, Richet N, Kellenberger C, Desmyter A,  
491 Mahony J, van Sinderen D, Cambillau C. 2016. The atomic structure of the phage Tuc2009 baseplate  
492 tripod suggests that host recognition involves two different carbohydrate binding modules. *MBio*  
493 7:e01781-15.
- 494 10. Howard-Varona C, Hargreaves KR, Abedon ST, Sullivan MB. 2017. Lysogeny in nature: mechanisms,  
495 impact and ecology of temperate phages. *ISME J* 11:1511–1520.



- 496 11. Pleška M, Lang M, Refardt D, Levin BR, Guet CC. 2018. Phage-host population dynamics promotes  
497 prophage acquisition in bacteria with innate immunity. *Nat Ecol Evol* 2:359–366.
- 498 12. Erez Z, Steinberger-Levy I, Shamir M, Doron S, Stokar-Avihail A, Peleg Y, Melamed S, Leavitt A, Savidor  
499 A, Albeck S, Amitai G, Sorek R. 2017. Communication between viruses guides lysis-lysogeny decisions.  
500 *Nature* 541:488–493.
- 501 13. Dou C, Xiong J, Gu Y, Yin K, Wang J, Hu Y, Zhou D, Fu X, Qi S, Zhu X, Yao S, Xu H, Nie C, Liang Z, Yang S,  
502 Wei Y, Cheng W. 2018. Structural and functional insights into the regulation of the lysis-lysogeny  
503 decision in viral communities. *Nat Microbiol* 3:1285–1294.
- 504 14. Gowen B, Bamford JKH, Bamford DH, Fuller SD. 2003. The tailless icosahedral membrane virus PRD1  
505 localizes the proteins involved in genome packaging and injection at a unique vertex. *J Virol* 77:7863–  
506 71.
- 507 15. Poranen MM, Domanska A. 2009. Virus entry to bacterial cells, p. 365–370. *In* van Regenmortel, MHV,  
508 Mahy, BWJ (eds.), *Desk encyclopedia of general virology*, 1st ed. Academic Press.
- 509 16. Sun Y, Roznowski AP, Tokuda JM, Klose T, Mauney A, Pollack L, Fane BA, Rossmann MG. 2017.  
510 Structural changes of tailless bacteriophage  $\Phi$ x174 during penetration of bacterial cell walls. *Proc Natl*  
511 *Acad Sci U S A* 114:13708–13713.
- 512 17. Russel M. 1991. Filamentous phage assembly. *Mol Microbiol* 5:1607–13.
- 513 18. Marvin DA, Symmons MF, Straus SK. 2014. Structure and assembly of filamentous bacteriophages. *Prog*  
514 *Biophys Mol Biol* 114:80–122.
- 515 19. Putzrath RM, Maniloff J. 1977. Growth of an enveloped mycoplasmavirus and establishment of a carrier  
516 state. *J Virol* 22:308–314.
- 517 20. Krupovic M, ICTV Report Consortium. 2018. ICTV virus taxonomy profile: Plasmaviridae. *J Gen Virol*  
518 99:617–618.
- 519 21. Hobbs Z, Abedon ST. 2016. Diversity of phage infection types and associated terminology: the problem  
520 with ‘Lytic or lysogenic.’ *FEMS Microbiol Lett* 363:fnw047.
- 521 22. Oksanen HM, Poranen MM, Bamford DH. 2010. Bacteriophages: Lipid-containing *Encyclopedia of Life*  
522 *Sciences*. John Wiley & Sons, Ltd, Chichester, UK.
- 523 23. Alexeeva S, Guerra Martínez JA, Spus M, Smid EJ. 2018. Spontaneously induced prophages are  
524 abundant in a naturally evolved bacterial starter culture and deliver competitive advantage to the host.  
525 *BMC Microbiol* 18:120.
- 526 24. Lavigne R, Molineux IJ, Kropinski AM. 2012. Order - Caudovirales, p. 39–45. *In* King, AMQ, Adams, MJ,  
527 Carstens, EB, Lefkowitz, EJ (eds.), *Virus Taxonomy: Ninth Report of the International Committee on*  
528 *Taxonomy of Viruses*. Elsevier.
- 529 25. Fu Y, Wu Y, Yuan Y, Gao M. 2019. Prevalence and diversity analysis of candidate prophages to provide  
530 an understanding on their roles in *Bacillus thuringiensis*. *Viruses* 11:388.
- 531 26. Zhu W, Wang J, Zhu Y, Tang B, Zhang Y, He P, Zhang Y, Liu B, Guo X, Zhao G, Qin J. 2015. Identification of  
532 three extra-chromosomal replicons in *Leptospira* pathogenic strain and development of new shuttle  
533 vectors. *BMC Genomics* 16:90.
- 534 27. Hertel R, Rodríguez DP, Hollensteiner J, Dietrich S, Leimbach A, Hoppert M, Liesegang H, Volland S.  
535 2015. Genome-based identification of active prophage regions by next generation sequencing in  
536 *Bacillus licheniformis* DSM13. *PLoS One* 10:e0120759.
- 537 28. Solem C, Defoor E, Jensen PR, Martinussen J. 2008. Plasmid pCS1966, a new selection/counterselction  
538 tool for lactic acid bacterium strain construction based on the *oroP* gene, encoding an orotate  
539 transporter from *Lactococcus lactis*. *Appl Environ Microbiol* 74:4772–4775.
- 540 29. Pinto JPC, Zeyniyev A, Karsens H, Trip H, Lolkema JS, Kuipers OP, Kok J. 2011. pSEUDO, a genetic  
541 integration standard for *Lactococcus lactis*. *Appl Environ Microbiol* 77:6687–6690.
- 542 30. Maguin E, Duwat P, Hege T, Ehrlich D, Gruss A. 1992. New thermosensitive plasmid for Gram-positive  
543 bacteria. *J Bacteriol* 174:5633–8.

- 544 31. Pédelacq J-D, Cabantous S, Tran T, Terwilliger TC, Waldo GS. 2006. Engineering and characterization of  
545 a superfolder green fluorescent protein. *Nat Biotechnol* 24:79–88.
- 546 32. Jensen PR, Hammer K. 1998. The sequence of spacers between the consensus sequences modulates  
547 the strength of prokaryotic promoters. *Appl Environ Microbiol* 64:82–87.
- 548 33. Leenhouts K, Venema G, Kok J. 1998. A lactococcal pWV01-based integration toolbox for bacteria.  
549 *Methods Cell Sci* 20:35–50.
- 550 34. Jensen PR, Hammer K. 1993. Minimal requirements for exponential growth of *Lactococcus lactis*. *Appl*  
551 *Environ Microbiol* 59:4363–6.
- 552 35. Brussaard CPD. 2009. Enumeration of bacteriophages using flow cytometry. *Methods Mol Biol* 501:97–  
553 111.
- 554 36. Christie WW, Noble RC, Davies G. 1987. Phospholipids in milk and dairy products. *Int J Dairy Technol*  
555 40:10–12.
- 556 37. Mitra K, Ubarretxena-Belandia I, Taguchi T, Warren G, Engelman DM. 2004. Modulation of the bilayer  
557 thickness of exocytic pathway membranes by membrane proteins rather than cholesterol. *Proc Natl*  
558 *Acad Sci U S A* 101:4083–4088.
- 559 38. Driessen AJM, Zheng T, In't Veld G, Op den Kamp JAF, Konings WN. 1988. Lipid requirement of the  
560 branched-chain amino acid transport system of *Streptococcus cremoris*. *Biochemistry* 27:865–872.
- 561 39. Epanand RM, Epanand RF. 2009. Domains in bacterial membranes and the action of antimicrobial agents.  
562 *Mol Biosyst* 5:580–587.
- 563 40. Matsumoto K, Kusaka J, Nishibori A, Hara H. 2006. Lipid domains in bacterial membranes. *Mol*  
564 *Microbiol* 61:1110–1117.
- 565 41. Keen EC. 2015. A century of phage research: bacteriophages and the shaping of modern biology.  
566 *BioEssays* 37:6–9.
- 567 42. Mäntynen S, Sundberg LR, Oksanen HM, Poranen MM. 2019. Half a century of research on membrane-  
568 containing bacteriophages: bringing new concepts to modern virology. *Viruses* 11:76.
- 569 43. Bamford DH, Romantschuk M, Somerharju PJ. 1987. Membrane fusion in prokaryotes: bacteriophage  
570 phi 6 membrane fuses with the *Pseudomonas syringae* outer membrane. *EMBO J* 6:1467–1473.
- 571 44. Poranen MM, Bamford DH. 2008. Entry of a segmented dsRNA virus into the bacterial cell, p. 215–226.  
572 *In* Patton, JT (ed.), *Segmented Double-stranded RNA Viruses: Structure and Molecular Biology*. Caister  
573 Academic Press, Norfolk, UK.
- 574 45. Harrison SC. 2015. Viral membrane fusion. *Virology* 479–480:498–507.
- 575 46. Lyytinen OL, Starkova D, Poranen MM. 2019. Microbial production of lipid-protein vesicles using  
576 enveloped bacteriophage phi6. *Microb Cell Fact* 18:29.
- 577 47. Rydman PS, Bamford DH. 2003. Identification and mutational analysis of bacteriophage PRD1 holin  
578 protein P35. *J Bacteriol* 185:3795–3803.
- 579 48. Krupovič M, Daugelavičius R, Bamford DH. 2007. A novel lysis system in PM2, a lipid-containing marine  
580 double-stranded DNA bacteriophage. *Mol Microbiol* 64:1635–1648.
- 581 49. Mindich L, Bamford D, McGraw T, Mackenzie G. 1982. Assembly of bacteriophage PRD1: particle  
582 formation with wild-type and mutant viruses. *J Virol* 44:1021–1030.
- 583 50. Abrescia NGA, Grimes JM, Kivelä HM, Assenberg R, Sutton GC, Butcher SJ, Bamford JKH, Bamford DH,  
584 Stuart DI. 2008. Insights into virus evolution and membrane biogenesis from the structure of the  
585 marine lipid-containing bacteriophage PM2. *Mol Cell* 31:749–761.
- 586 51. Deatherage BL, Cookson BT. 2012. Membrane vesicle release in bacteria, eukaryotes, and archaea: A  
587 conserved yet underappreciated aspect of microbial life. *Infect Immun* 80:1948–1957.
- 588 52. Mashburn-Warren LM, Whiteley M. 2006. Special delivery: vesicle trafficking in prokaryotes. *Mol*  
589 *Microbiol* 61:839–846.

- 590 53. Schwechheimer C, Kuehn MJ. 2015. Outer-membrane vesicles from Gram-negative bacteria: biogenesis  
591 and functions. *Nat Rev Microbiol* 13:605–619.
- 592 54. Rodrigues ML, Nimrichter L, Oliveira DL, Frases S, Miranda K, Zaragoza O, Alvarez M, Nakouzi A,  
593 Feldmesser M, Casadevall A. 2007. Vesicular polysaccharide export in *Cryptococcus neoformans* is a  
594 eukaryotic solution to the problem of fungal trans-cell wall transport. *Eukaryot Cell* 6:48–59.
- 595 55. Marsollier L, Brodin P, Jackson M, Korduláková J, Tafelmeyer P, Carbonnelle E, Aubry J, Milon G, Legras  
596 P, André J-P Saint, Leroy C, Cottin J, Guillou MLJ, Reyssat G, Cole ST. 2007. Impact of *Mycobacterium*  
597 *ulcerans* Biofilm on Transmissibility to Ecological Niches and Buruli Ulcer Pathogenesis. *PLoS Pathog*  
598 3:e62.
- 599 56. Lee E-Y, Choi D-Y, Kim D-K, Kim J-W, Park JO, Kim S, Kim S-H, Desiderio DM, Kim Y-K, Kim K-P, Gho YS.  
600 2009. Gram-positive bacteria produce membrane vesicles: proteomics-based characterization of  
601 *Staphylococcus aureus*-derived membrane vesicles. *Proteomics* 9:5425–5436.
- 602 57. Brown L, Wolf JM, Prados-Rosales R, Casadevall A. 2015. Through the wall: extracellular vesicles in  
603 Gram-positive bacteria, mycobacteria and fungi. *Nat Rev Microbiol* 13:620–630.
- 604 58. Wang X, Thompson CD, Weidenmaier C, Lee JC. 2018. Release of *Staphylococcus aureus* extracellular  
605 vesicles and their application as a vaccine platform. *Nat Commun* 9:1–13.
- 606 59. Toyofuku M, Cárcamo-Oyarce G, Yamamoto T, Eisenstein F, Hsiao CC, Kurosawa M, Gademann K,  
607 Pilhofer M, Nomura N, Eberl L. 2017. Prophage-triggered membrane vesicle formation through  
608 peptidoglycan damage in *Bacillus subtilis*. *Nat Commun* 8:481.
- 609 60. Andreoni F, Toyofuku M, Menzi C, Kalawong R, Shambat SM, François P, Zinkernagel AS, Eberl L. 2019.  
610 Antibiotics stimulate formation of vesicles in *staphylococcus aureus* in both phage-dependent and -  
611 independent fashions and via different routes. *Antimicrob Agents Chemother* 63:e01439-18.
- 612 61. Vermassen A, Leroy S, Talon R, Provot C, Popowska M, Desvaux M. 2019. Cell wall hydrolases in  
613 bacteria: Insight on the diversity of cell wall amidases, glycosidases and peptidases toward  
614 peptidoglycan. *Front Microbiol* 10:331.

615

616

617 **Figures**

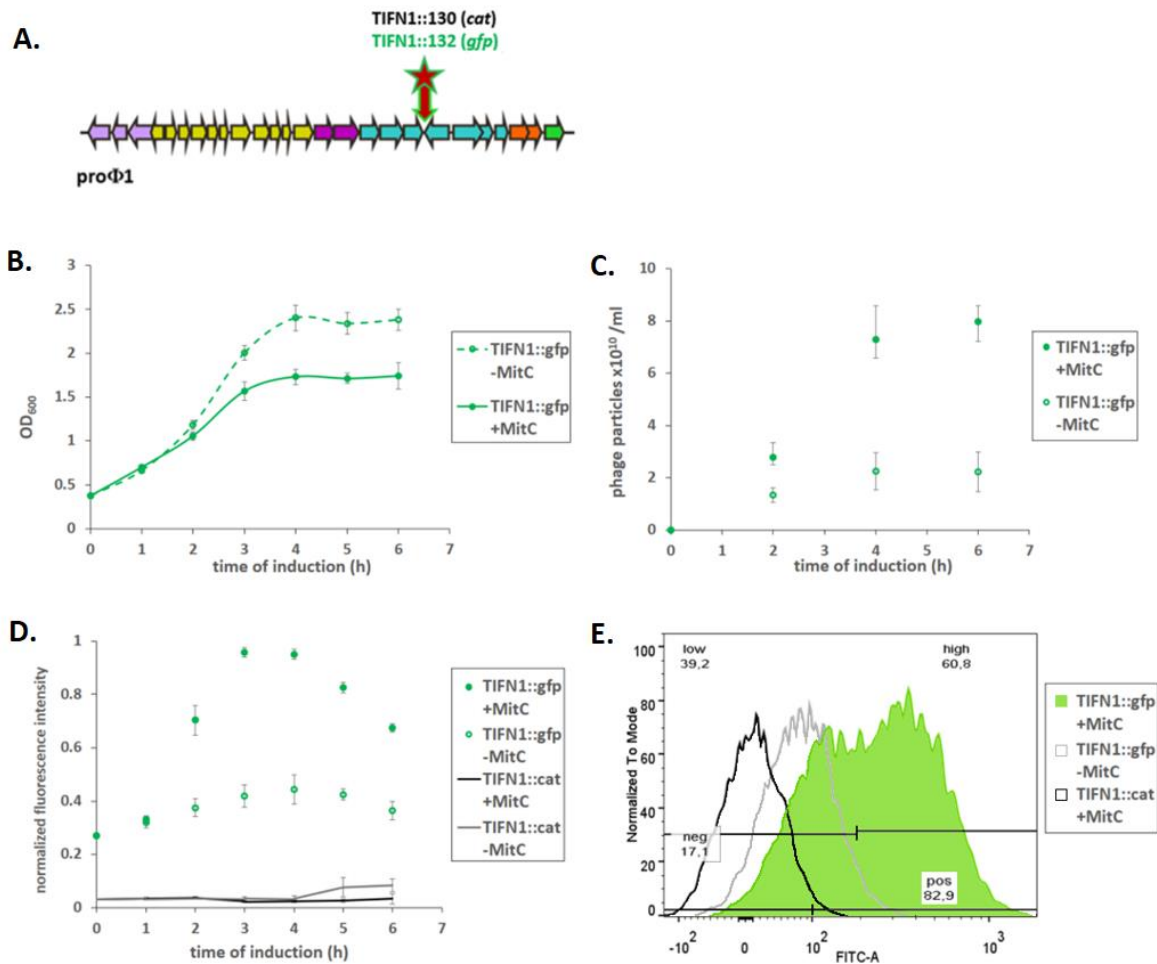

618

619 **Figure 1. Phage labelling and examination of phage replication. (A)** Schematic drawing of the prophage genome  
 620 with marked *gfp* and *cat* insertion sites. Arrows represent ORFs and indicate the direction of gene transcription.  
 621 The number of arrows does not reflect the real ORF numbers but is only a schematic presentation. The insertion  
 622 was made in between two convergent ORFs. Colors in arrows schematically represent different phage gene  
 623 clusters. **(B)** Growth response of TIFN1::gfp to MitC treatment. **(C)** Phage release by TIFN1::gfp during MitC  
 624 induction. Green symbols represent MitC treated cultures, grey symbols represent control cultures without MitC.  
 625 **(D)** Dynamics of phage replication (as derived from average cell fluorescence intensity) during MitC induction  
 626 (green symbols) and in uninduced samples (grey symbols) in reporter strain (TIFN1::gfp) compared to base-line  
 627 fluorescence of non-*gfp* cultures (TIFN1::cat, black and grey lines for induced and uninduced conditions  
 628 respectively). **(E)** Fluorescence distribution in the population at 3 hours of induction in non-*gfp* TIFN1::cat (black  
 629 unfilled), uninduced TIFN1::gfp (grey unfilled), and MitC induced TIFN1::gfp (green filled) cultures. The statistics  
 630 in (e) is shown for induced TIFN1::gfp: 82.9% of the population was positive for green fluorescence (pos 82.9),  
 631 17.1% was fluorescence-negative (neg 17.1); 60.8% was highly fluorescent (high 60.8) and 39.2% was low in  
 632 fluorescence (low 39.2).

633

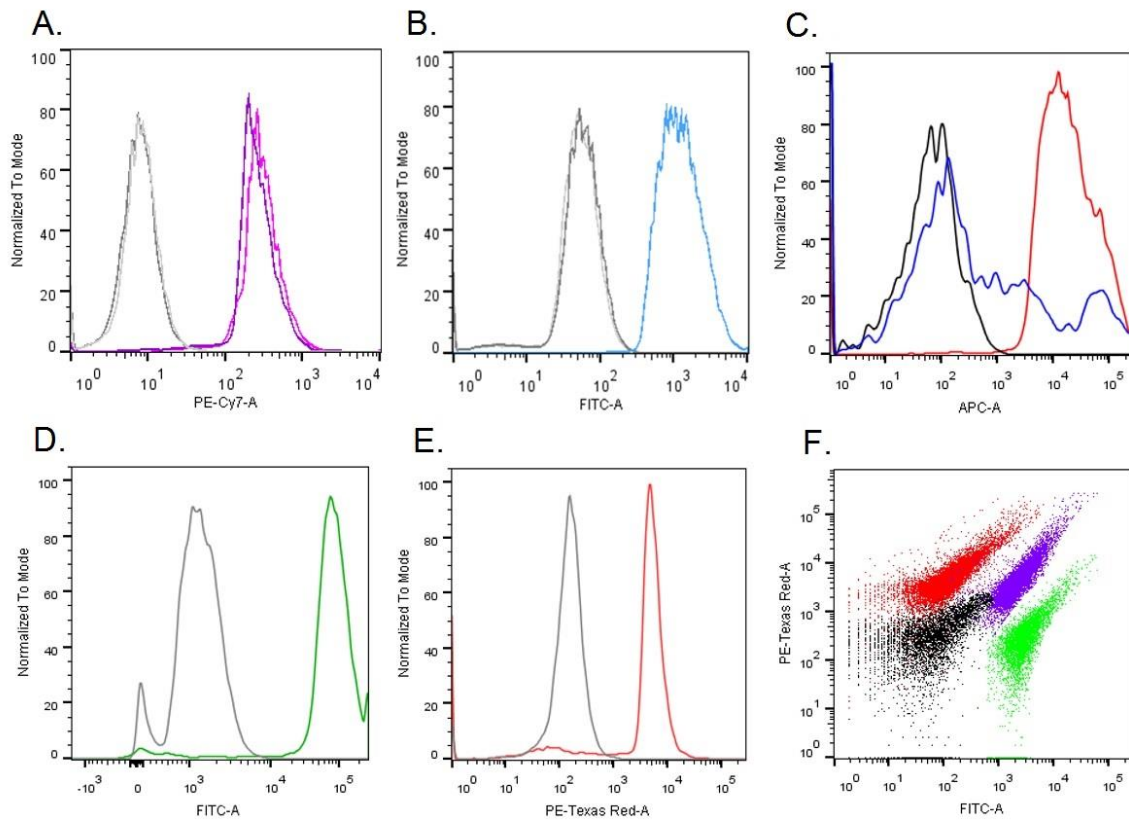

634  
635 **Figure 2. Staining proPhi1 particles with various lipophilic (A, B, C, F) and DNA binding (D, E, F) dyes followed**  
636 **by flow cytometry analysis.** Grey/black - unstained phage particles. (A) Lipophilic dye 1; (B) Lipophilic dye 2; (C)  
637 Lipophilic dye 3, the blue line represents the sample stained after chloroform treatment; (D) DNA dye 1; (E) DNA  
638 dye 2; (F) superimposed dot plot of proPhi1 particle samples with different staining: unstained (black), lipophilic  
639 dye 2 (green), DNA dye 2 (red), and double stained lipophilic dye 2 and DNA dye 2 (purple-blue).

640

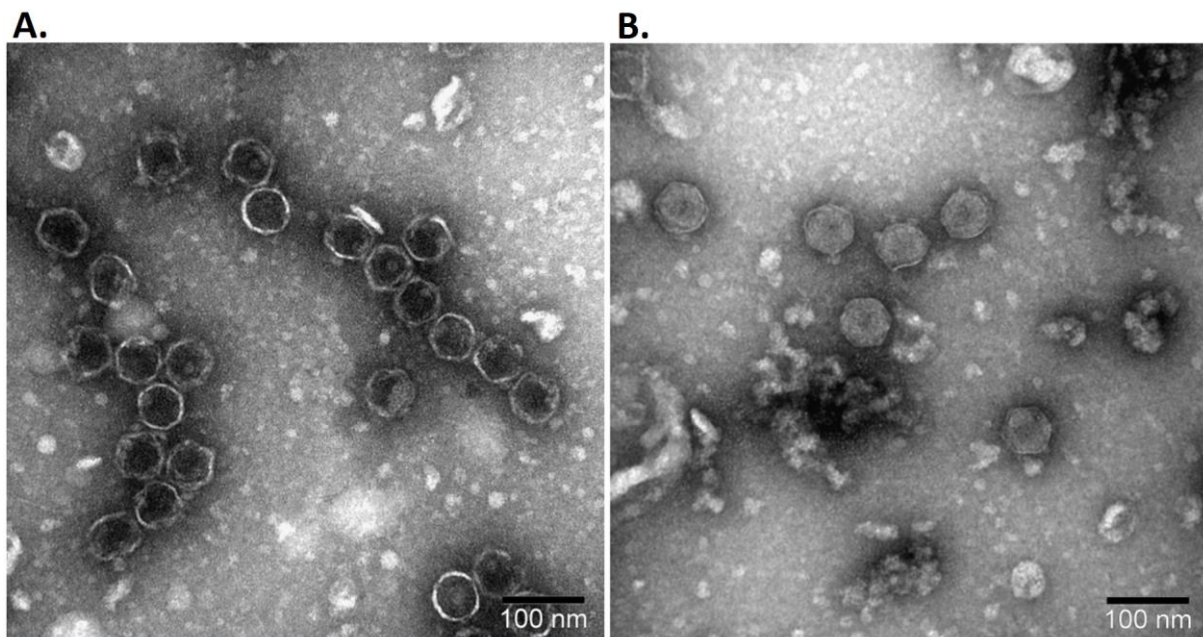

641  
642 **Figure 3. Transmission electron micrograph of proPhi1 with (A) and without (B) chloroform treatment.**

643

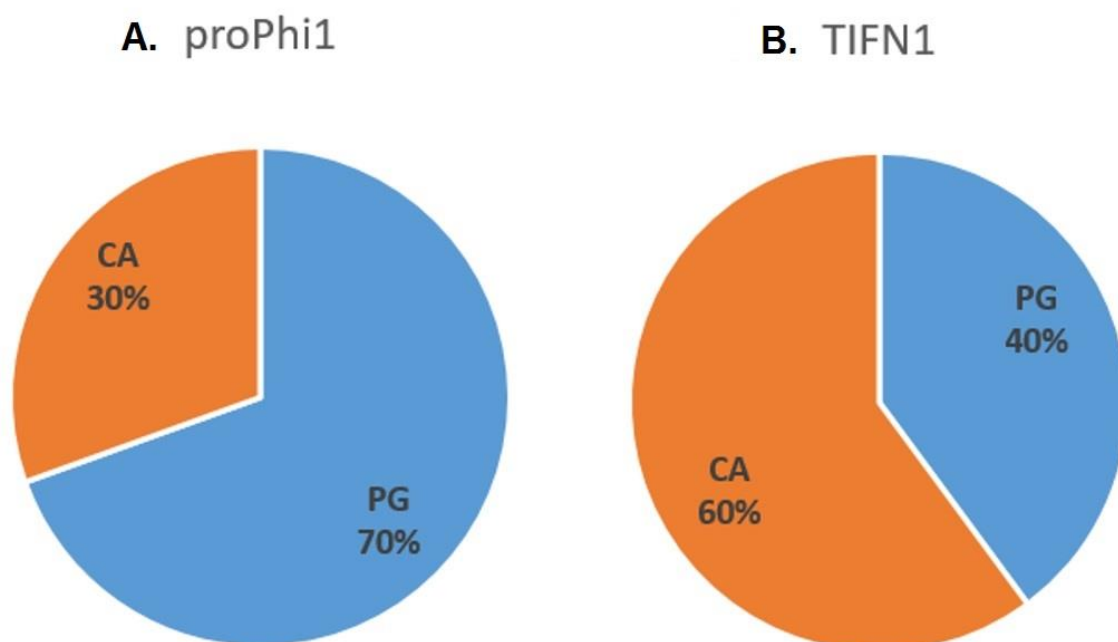

644

645

646

**Figure 4. Phage and cell lipid composition.** Composition of lipids extracted from A) isolated proPhi1 phage particles and (B) TIFN1 whole cell-derived protoplast. PG, phosphatidyl glycerol; CA, cardiolipin.

647

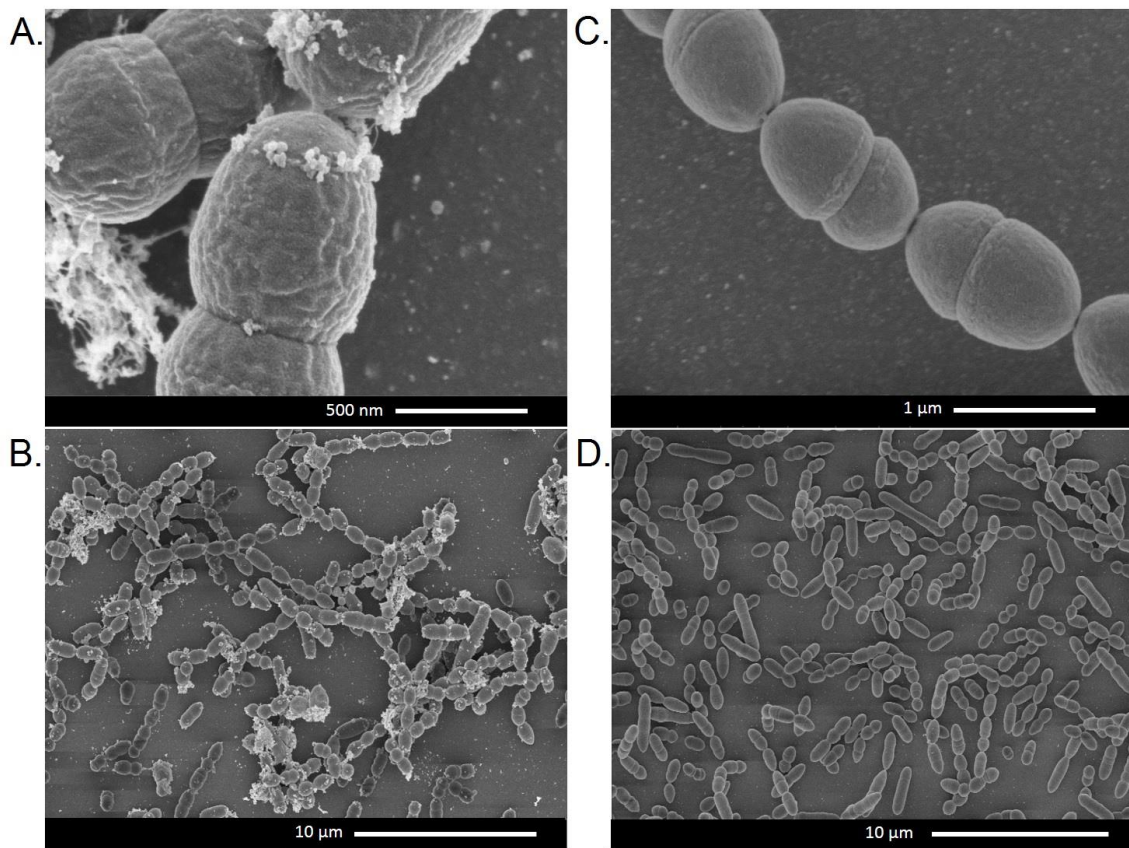

648  
649 **Figure 5. Scanning electron micrograph of cells subjected to 6h MitC treatment. (A) and (B) TIFN1, (C) and (D)**  
650 **T11c.**

651

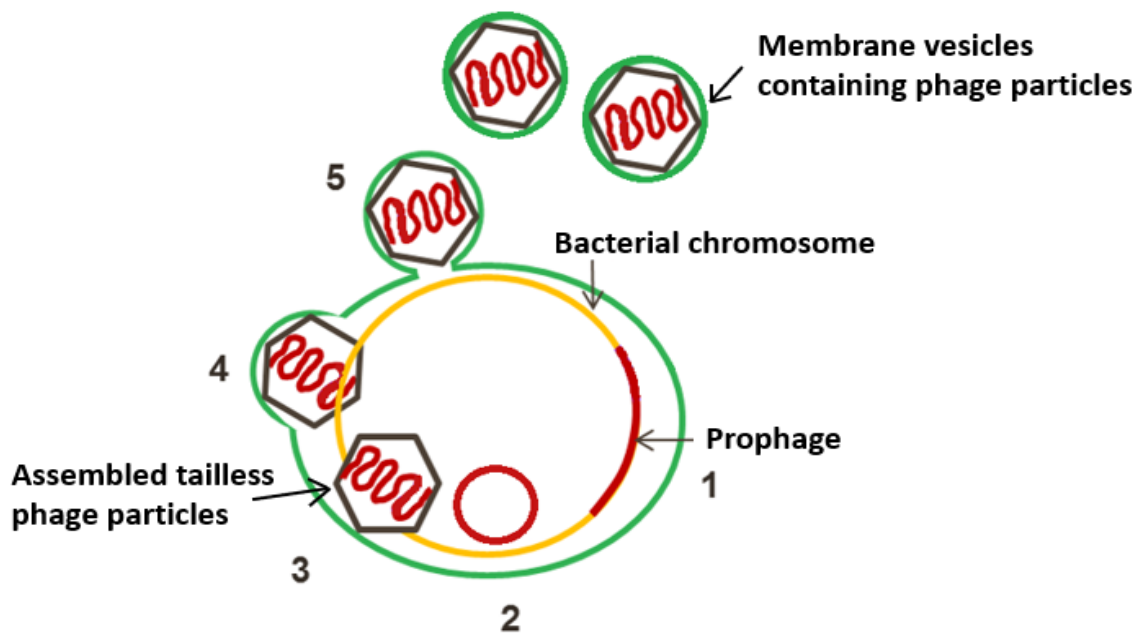

652  
653 **Figure 6. Schematic presentation of the proposed mechanism (step 1-5) of phage release from *Lactococcus***  
654 ***lactis* TIFN1. Activation of proPhi1 (step 1 and 2) results in production of tailless *Siphoviridae* phage particles (3),**

655 enclosed in lipid membrane derived from the cytoplasmic membrane (green) (4), and released from the cells by  
656 a budding-like, non-lytic mechanism (5).

657



658 **Supplementary materials**

659

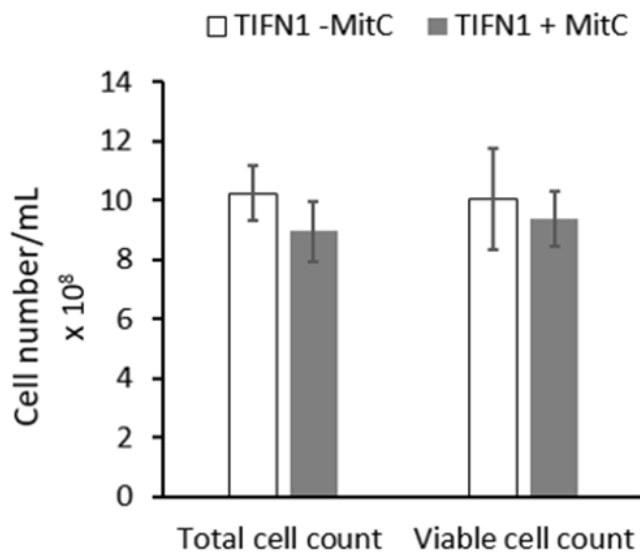

660

661 **Figure S1. Cell count of *Lactococcus lactis* strain TIFN1 under phage induction conditions.** Total cell count  
662 (obtained by counting cells using a haemocytometer) and viable cell count (determined by plating and colony  
663 count) in TIFN1 cultures induced with MitC at 7 hours and control cultures without induction.

664

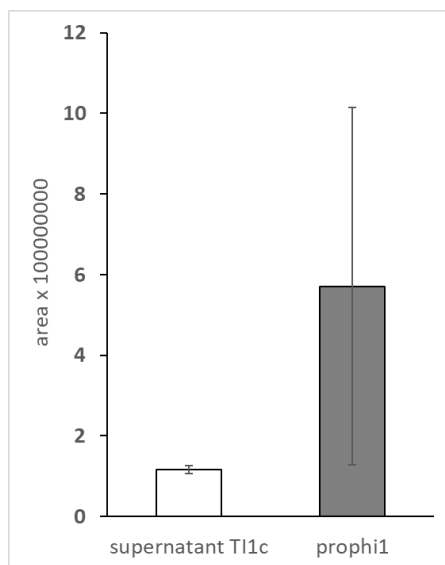

665

666 **Figure S2. Lipid (sum of phosphatidyl glycerol and cardiolipin) signal detected in culture supernatant of**  
667 **phage-free control T11c and proPhi1 collected from culture supernatant of TIFN1.**

668

669
